# Supplementary material for: Ligand-free and size-controlled synthesis of oxygen vacancy-rich WO3−x quantum dots for efficient room-temperature formaldehyde gas sensing
Source: Royal Society of Chemistry journal article supplement (doi:10.1039/c6ra20531c), 2016-01-01
Supplement: c6ra20531c1.pdf [file c6ra20531c1.pdf]

## Supporting Information

### **Ligand-Free and Size-Controlled Synthesis of Oxygen Vacancy-Rich $WO_{3-x}$ Quantum Dots for Efficient Room-Temperature Formaldehyde Gas Sensing**

*Yahui Li, Qiqi Zhang, Xinshi Li, Hua Bai, Wentao Li, Tingting Zeng, and*

*Guangcheng Xi\**

#### **Experimental Section**

*Synthesis of  $m-WO_{3-x}$  QDs:* In a typical synthesis, 0.05 g of anhydrous tungsten chloride ( $WCl_6$ ) and 1.0 mL of hydrazine hydrate ( $N_2H_4 \cdot H_2O$ ) were added to 40 mL of anhydrous ethanol in a nitrogen-filled glove box. The obtained blue solution was transferred to a sealed Teflon-lined autoclave. The autoclave was placed in a precision blowing oven with accurate temperature control at 180 °C and was maintained at this temperature for 11 hours. After the reaction, the autoclave was naturally cooled to room temperature, and the obtained blue products were collected by high-speed centrifugation and washed with distilled water and anhydrous ethanol three times. Finally, the sample was dried under vacuum at 50 °C in a vacuum drying box for 4 h.

*Characterization:* The X-ray diffraction (XRD) patterns of the products were recorded on a Bruker D8 Focus diffractometer using  $CuK\alpha$  radiation ( $\lambda = 1.54178 \text{ \AA}$ ). Scanning electron microscopy (SEM) images and energy-dispersive X-ray (EDS) spectra were obtained on a Hitachi S-4800 instrument. Transmission electron microscopy (TEM), high-resolution TEM (HRTEM), and EDS mapping characterizations were performed

on a Tecnai G F30 operated at 300 kV. UV–Vis–NIR absorption spectra were recorded on a Shimadzu UV-3600. X-ray photoelectron spectroscopy (XPS) experiments were performed in a Theta probe (Thermo Fisher) using monochromated Al K $\alpha$  X-rays at  $h\nu = 1486.6$  eV. The peak positions were internally referenced to the C1s peak at 284.6 eV. Fourier transform infrared (FTIR) spectra were obtained on a Thermo Iz10 instrument. The Raman spectra were produced at room temperature on a Renishaw-inVia Raman spectrometer with an argon-ion laser at an excitation wavelength of 514.5 nm.

*Gas-Sensing Measurements:* The m-WO<sub>3-x</sub> QD sensor was fabricated by dip-coating the as-prepared WO<sub>3-x</sub> quantum dot alcohol colloids to the ceramic tube of the sensor body without an additional aging process. The structure of the WO<sub>3-x</sub> QDs-based gas sensor is shown in Figure S7. The gas-sensing properties of the WO<sub>3-x</sub> QDs-based sensor were detected on a gas-sensitive cell testing system (WS-60A, Zhengzhou Winsen Electronics Technology Co., Ltd. China). The structure of the WS-60A instrument is shown in Figure S8. The sensitivity (S) is defined as  $S=R_0/R$ , where  $R_0$  is the resistance in atmospheric air (relative humidity of approximately 20%) and R is the resistance of the WO<sub>3-x</sub> quantum dots in formaldehyde-air mixed gas.  $R_0$  was approximately 4.7 M $\Omega$  in atmospheric air at room temperature (20-25 °C).

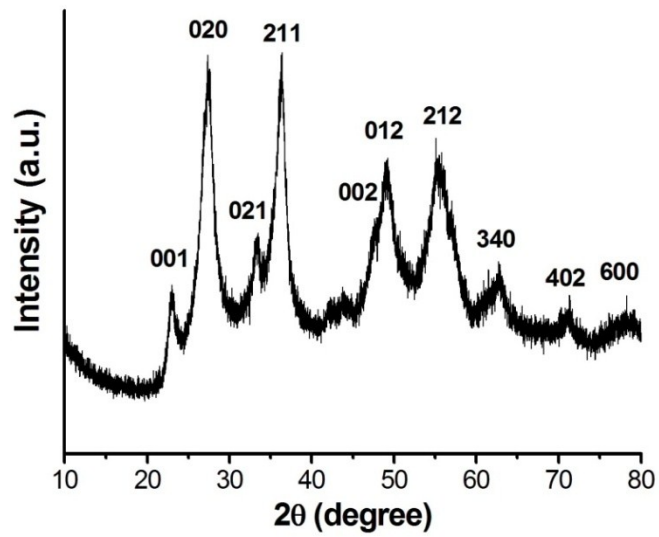

**Fig. S1** XRD pattern of the  $2.2 \pm 0.3$  nm  $\text{WO}_{3-x}$  quantum dots. All the diffraction peaks of the sample were easily indexed as monoclinic-phase  $\text{WO}_{3-x}$  (PCPDF no. 89-4476). All of the diffraction peaks of the sample were obviously widened, which strongly suggests a very small crystal grain size. According to the full width at half maximum (FWHM) of the (020) diffraction peak, the average grain size of the  $\text{m-WO}_{3-x}$  was approximately 2.3 nm.

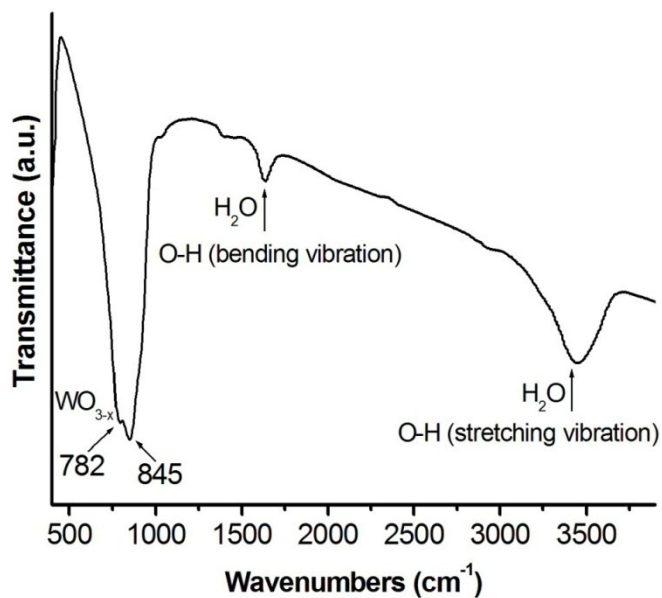

**Fig. S2.** FTIR spectrum of the  $2.2 \pm 0.3$  nm  $\text{WO}_{3-x}$  QDs. The bands in the region of  $1000\text{--}500$   $\text{cm}^{-1}$  are attributed to the W-O ( $845$   $\text{cm}^{-1}$ ) units and the stretching vibrations of the bridging oxygen atoms O-W-O ( $782$   $\text{cm}^{-1}$ ).

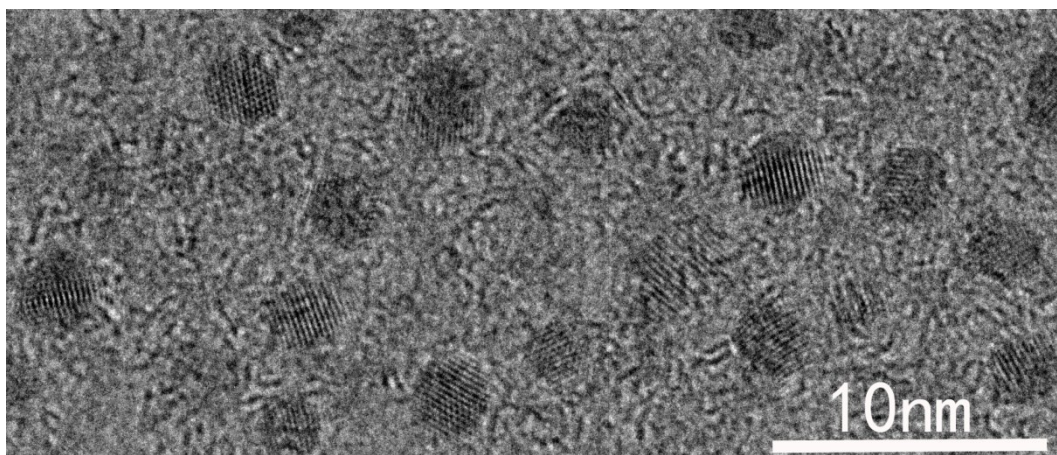

**Fig. S3.** HRTEM image showing a wide-area view of the as-prepared  $2.2 \pm 0.3$  nm m- $\text{WO}_{3-x}$  QDs. The clear crystal lattice fringes indicate that the m- $\text{WO}_{3-x}$  QDs were highly crystalline.

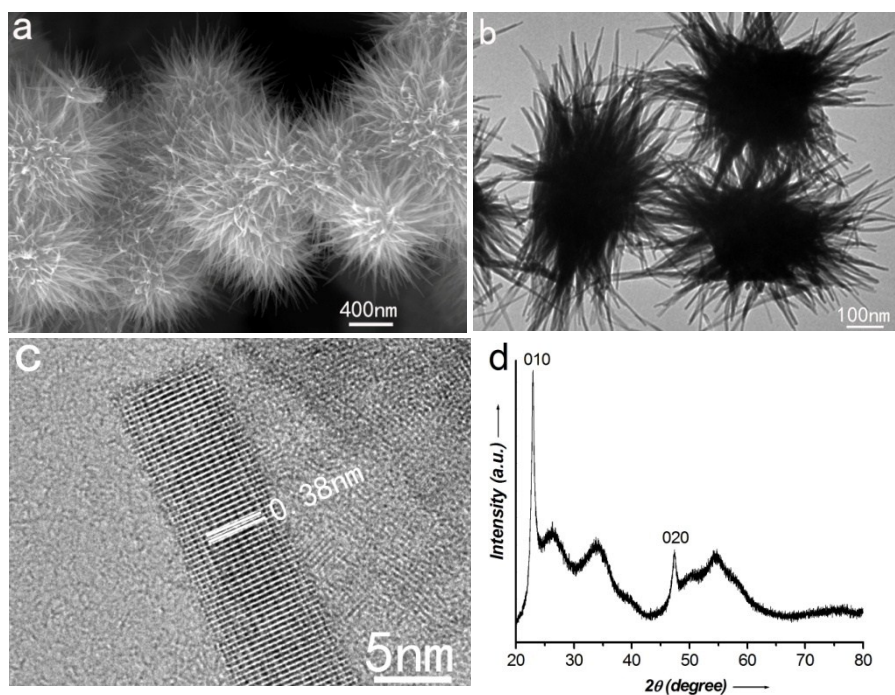

**Fig. S4.** Keeping the other reaction conditions unchanged, comparative experiments showed that only urchin-like  $W_{18}O_{49}$  nanowire aggregates were prepared by directly hydrolysing  $WCl_6$  in ethanol without  $N_2H_4 \cdot H_2O$ : a) SEM and b) TEM images of the urchin-like  $W_{18}O_{49}$  nanowire aggregates; c) HRTEM image of the  $W_{18}O_{49}$  nanowires, for which the lattice fringes with spacing of 0.38 nm can be indexed as the (010) crystal plane of monoclinic-phase  $W_{18}O_{49}$ ; d) XRD pattern of the  $W_{18}O_{49}$  nanowires, which can be indexed as monoclinic  $W_{18}O_{49}$  (JCPDS No.: 05–0392).<sup>[1,2]</sup>

## References

- [1] G. C. Xi, S. X. Ouyang, P. Li, J. H. Ye, Q. Ma, N. Su, H. Bai, C. Wang, *Angew. Chem. Int. Ed.*, **2012**, *51*, 2395–2399.
- [2] W. Cheng, Y. R. Ju, P. Payamyar, D. Primc, J. Y. Rao, C. Willa, D. Koziej, M. Niederberger, *Angew. Chem. Int. Ed.*, **2015**, *54*, 340–344.

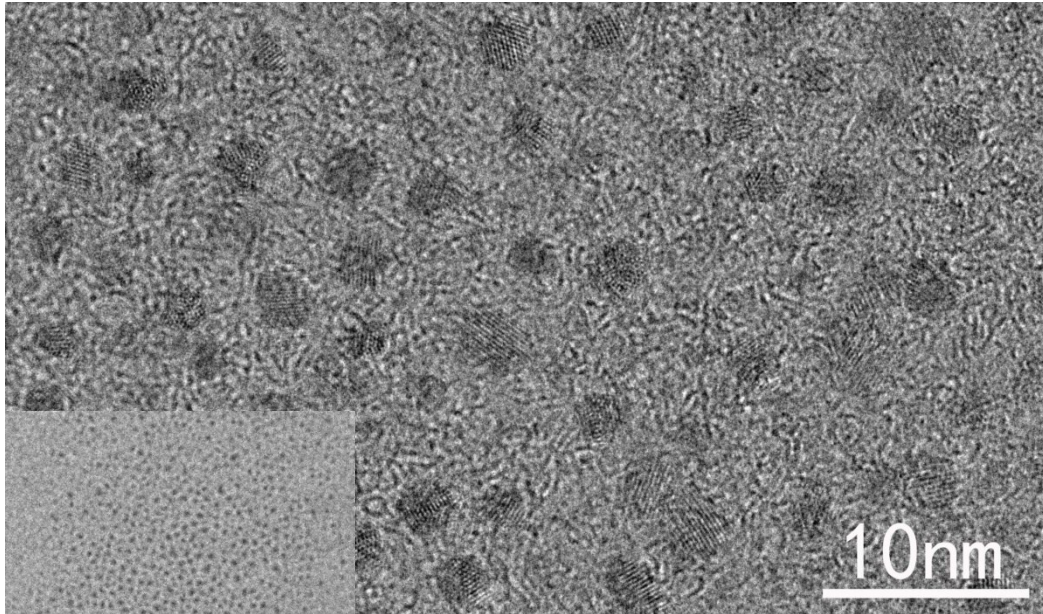

**Fig. S5** HRTEM and TEM (inset) images of the WO<sub>3</sub> QDs prepared by oxidizing the blue m-WO<sub>3-x</sub> QDs ( $2.2 \pm 0.3$  nm) with a dilute aqueous H<sub>2</sub>O<sub>2</sub> solution (1 M) at room temperature.

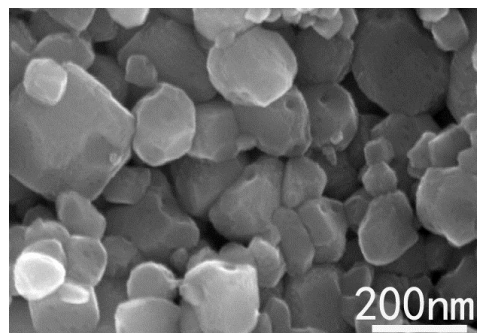

**Fig. S6** SEM image of commercial monoclinic-phase WO<sub>3</sub> powder.

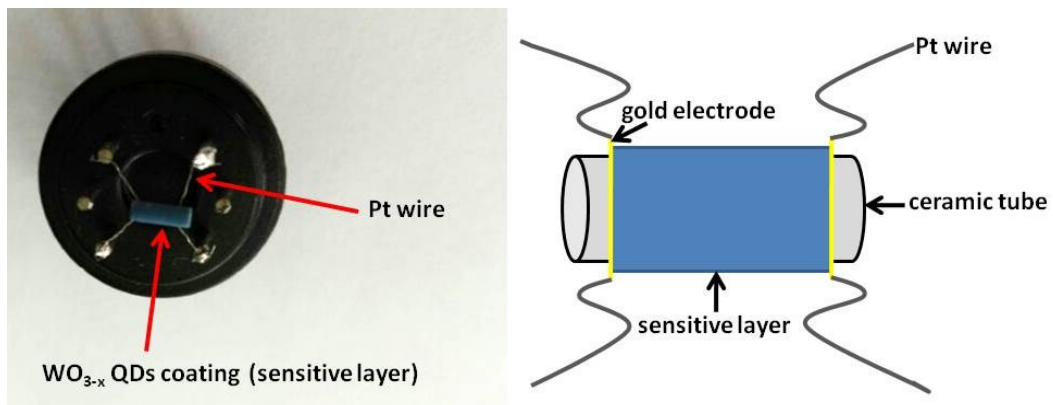

**Fig. S7.** Structure of the  $\text{WO}_{3-x}$  QD-based gas sensor.

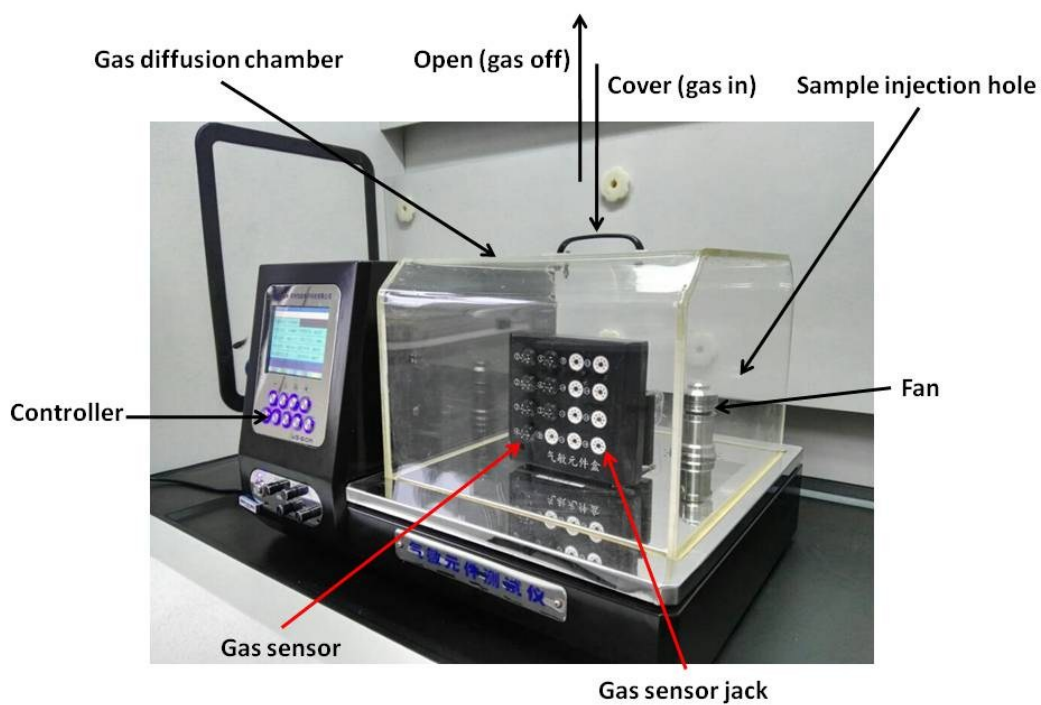

**Fig. S8.** Structure of the gas-sensing measurement system (WS-60A, Zhengzhou Winsen Electronics Technology Co., Ltd. China).
